# Supplementary material for: Identification of Zika Virus NS1-Derived Peptides with Potential Applications in Serological Tests
Source: MDPI journal article supplement (doi:10.3390/v15030654), 2023-02-28
Supplement: s1 [file s1]

**Table S1. Immunogenicity score of experimental ZIKV peptides.**

| Name    | Peptide             | Length | Score    |
|---------|---------------------|--------|----------|
| ZKvROX1 | AGPLSHHNTREGYRTQVK  | 18     | 0,10924  |
| ZKvROX2 | RTQVKGPWHSEELEI     | 15     | 0,14313  |
| ZKvROX3 | RFEECPGTKVYVEETCGT  | 18     | 0,21339  |
| ZKvROX4 | GPSLRSTTASGRVIEEW   | 17     | 0,16892  |
| ZKvROX5 | VIEEWCCRECTMPPLSFRA | 19     | 0,14706  |
| ZKvROX6 | EPESNLVRSMVTA       | 13     | -0,32935 |
