# Supplementary material for: Identification of Zika Virus NS1-Derived Peptides with Potential Applications in Serological Tests
Source: MDPI journal article supplement (doi:10.3390/v15030654), 2023-02-28
Supplement: s1 [file s1]

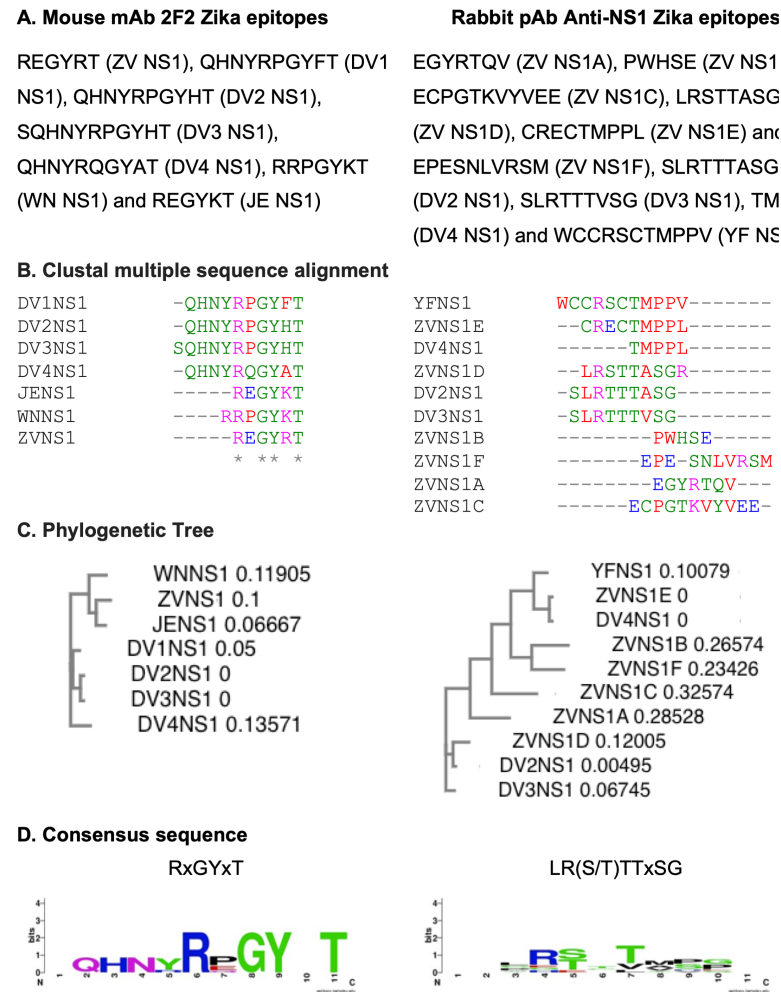

**Figure S1. General representation of the specifics of selected epitopes from linear epitope mapping.** A) Set of identified epitopes for mouse and rabbit antibodies. B) Multiple alignments performed by Clustal showing the conserved sequences between the NS1 from DV, JE, WN and ZV for mouse and YF, DV and ZV. C) Phylogenetic analysis to represent the similarity between the epitopes from flavivirus NS1 identified (DV, JE, WN and ZV for mouse and YF, DV and ZV). D) The consensus sequences RxGYxT and LR(S/T)TTxSG are represented in the form of a logo.
