# Supplementary material for: Identification of Zika Virus NS1-Derived Peptides with Potential Applications in Serological Tests
Source: MDPI journal article supplement (doi:10.3390/v15030654), 2023-02-28
Supplement: s1 [file s1]

Consensus  
Identity

1. ZIKV-299  
2. ZIKV-300  
3. ZIKV-301  
4. ZIKV-302  
5. ZIKV-303  
6. ZIKV-304  
7. ZIKV-305  
8. ZIKV-306  
9. ZIKV-307  
10. ZIKV-308  
11. ZIKV-309  
12. ZIKV-310  
13. ZIKV-311  
14. ZIKV-312  
15. ZIKV-313  
16. ZIKV-314  
17. ZIKV-315  
18. ZIKV-316  
19. ZIKV-317  
20. ZIKV-318  
21. ZIKV-319  
22. ZIKV-320  
23. ZIKV-321  
24. ZIKV-322  
25. ZIKV-323  
26. ZIKV-324  
27. ZIKV-325  
28. ZIKV-326  
29. ZIKV-327  
30. ZIKV-328  
31. ZIKV-329  
32. ZIKV-330  
33. ZIKV-331  
34. ZIKV-332  
35. ZIKV-333  
36. ZIKV-334  
37. ZIKV-335  
38. ZIKV-336  
39. ZIKV-337  
40. ZIKV-338  
41. ZIKV-339  
42. ZIKV-340  
43. ZIKV-341  
44. ZIKV-342  
45. ZIKV-343  
46. ZIKV-344  
47. ZIKV-345  
48. ZIKV-346  
49. ZIKV-347  
50. ZIKV-348  
51. ZIKV-349  
52. ZIKV-350  
53. ZIKV-351  
54. ZIKV-352  
55. ZIKV-353  
56. ZIKV-354  
57. ZIKV-355  
58. ZIKV-356  
59. ZIKV-357  
60. ZIKV-358  
61. ZIKV-359  
62. ZIKV-360  
63. ZIKV-361  
64. ZIKV-362  
65. ZIKV-363  
66. ZIKV-364  
67. ZIKV-365  
68. ZIKV-366  
69. ZIKV-367  
70. ZIKV-368  
71. ZIKV-369  
72. ZIKV-370  
73. ZIKV-371  
74. ZIKV-372  
75. ZIKV-373  
76. ZIKV-374  
77. ZIKV-375  
78. ZIKV-376  
79. ZIKV-377  
80. ZIKV-378  
81. ZIKV-379  
82. ZIKV-380  
83. ZIKV-381  
84. ZIKV-382  
85. ZIKV-383  
86. ZIKV-384  
87. ZIKV-385  
88. ZIKV-386  
89. ZIKV-387  
90. ZIKV-388  
91. ZIKV-389  
92. ZIKV-390  
93. ZIKV-391  
94. ZIKV-392  
95. ZIKV-393  
96. ZIKV-394  
97. ZIKV-395  
98. ZIKV-396  
99. ZIKV-397  
100. ZIKV-398  
101. ZIKV-399  
102. ZIKV-400  
103. ZIKV-401  
104. ZIKV-402  
105. ZIKV-403  
106. ZIKV-404  
107. ZIKV-405  
108. ZIKV-406  
109. ZIKV-407  
110. ZIKV-408  
111. ZIKV-409  
112. ZIKV-410  
113. ZIKV-411  
114. ZIKV-412  
115. ZIKV-413  
116. ZIKV-414  
117. ZKvROX1  
118. ZKvROX2  
119. ZKvROX3  
120. ZKvROX4  
121. ZKvROX5  
122. ZKvROX6
