# Supplementary material for: Identification of Zika Virus NS1-Derived Peptides with Potential Applications in Serological Tests
Source: MDPI journal article supplement (doi:10.3390/v15030654), 2023-02-28
Supplement: s1 [file s1]

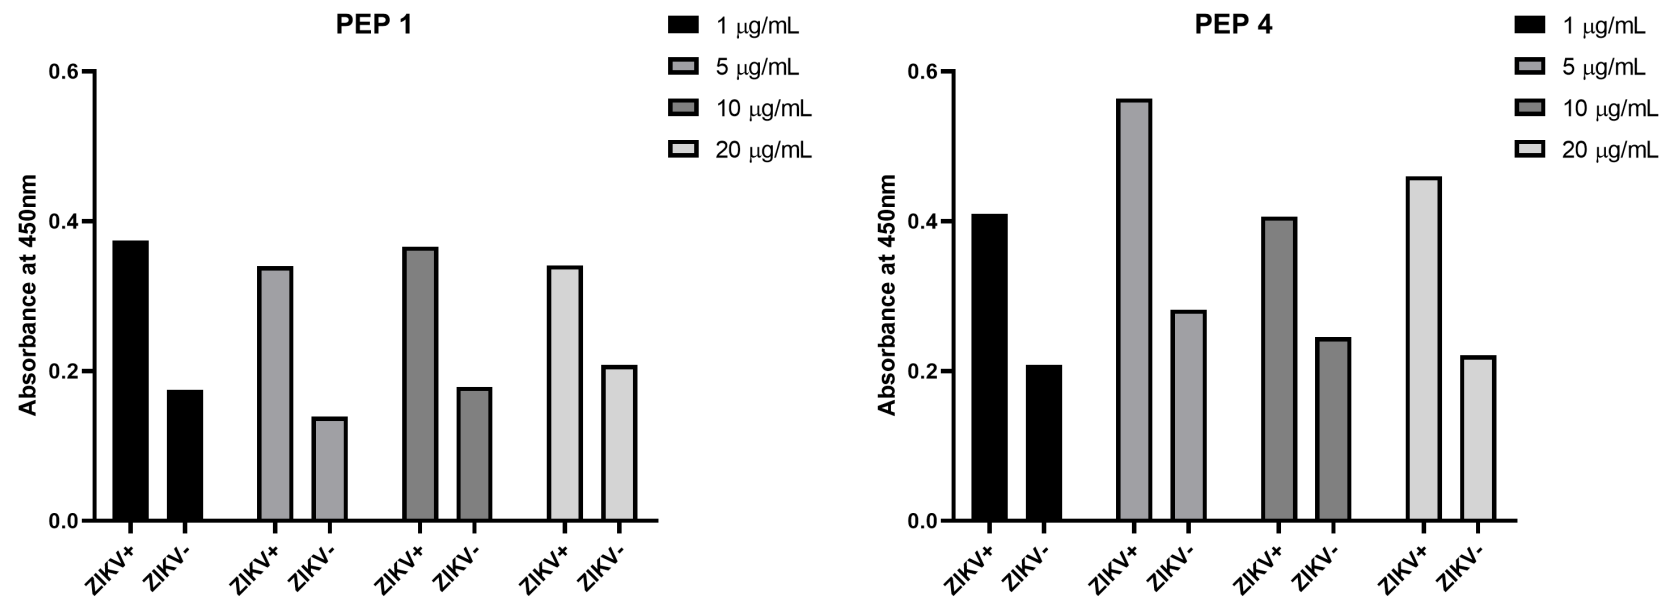

**Figure S3.** Reactivity of peptides ZKvROX1 and ZKvROX4 by four dilutions of peptides between ZIKV+ and ZIKV- serum IgG antibodies.
