# Supplementary material for: Identification of Zika Virus NS1-Derived Peptides with Potential Applications in Serological Tests
Source: Viruses. 2023 Feb 28;15(3):654. doi: 10.3390/v15030654 (PMC10052002; doi:10.3390/v15030654)
Supplement: Supplementary file 1 [file viruses-15-00654-s001.zip]

Archive with 7 entries (7 files):
- Legends of supplemental figures.pdf
- Supplementary File S1.pdf
- Supplementary File S2.pdf
- Supplementary File S3.pdf
- Supplementary File S4.pdf
- Supplementary File S5.pdf
- Supplementary Table S1.pdf
